# Supplementary material for: Heterologous Booster Dose with CORBEVAX following Primary Vaccination with COVISHIELD Enhances Protection against SARS-CoV-2
Source: MDPI journal article supplement (doi:10.3390/vaccines10122146), 2022-12-14
Supplement: s1 [file s1]

## Supplementary Data

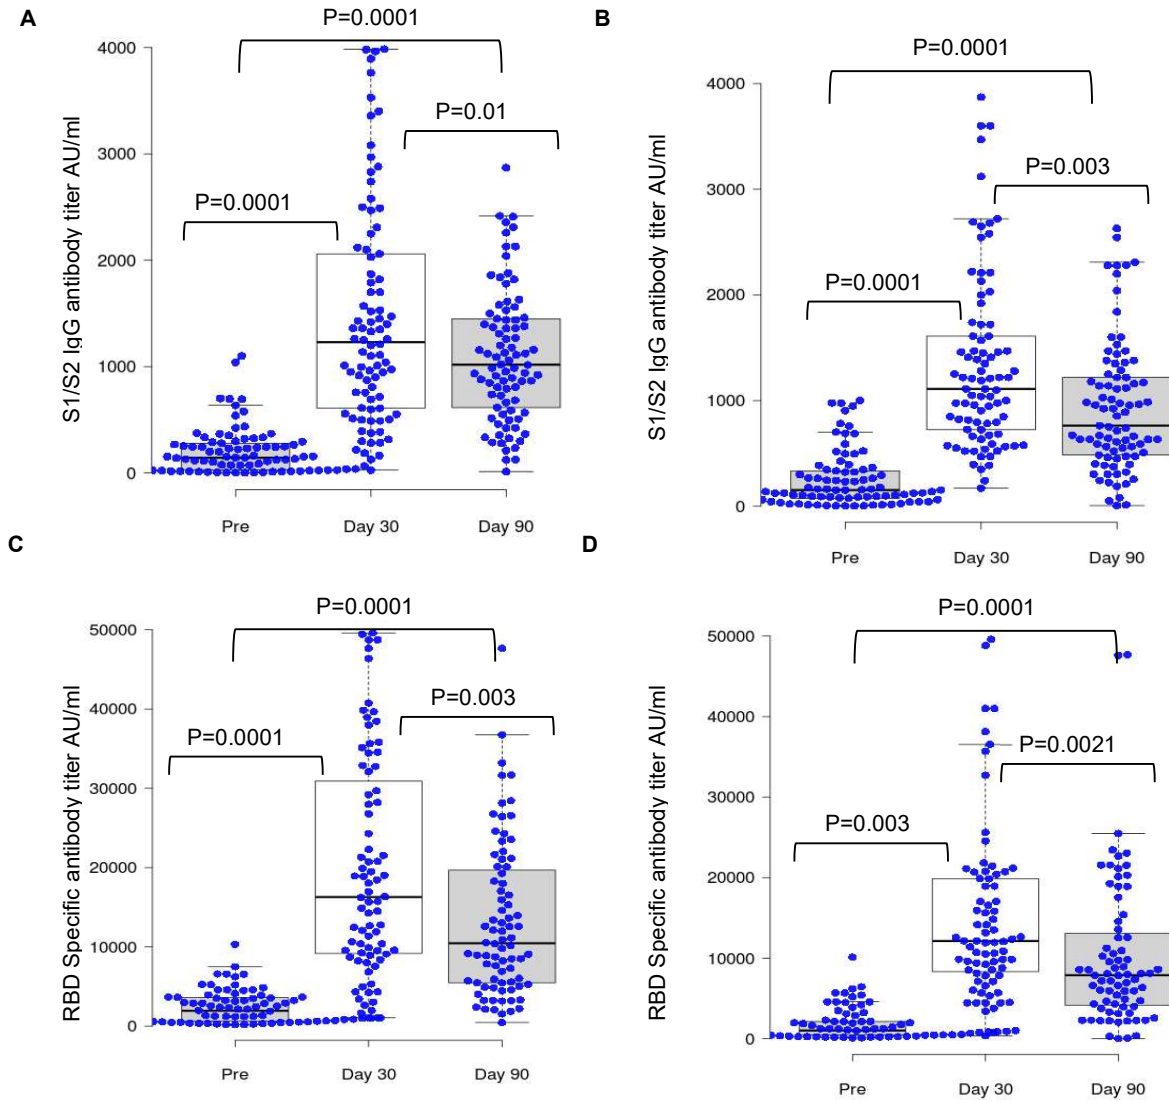

**Figure S1.** Booster dose vaccine elicited antibody response and immune cell response: Comparative evaluation of SARS-CoV-2 S1/S2 Spike IgG antibodies before (pre) and after booster vaccination at day 30 and day 90 with (A) Corbevax (Heterologous) and (B) Covishield (Homologous). SARS-CoV-2 RBD specific antibodies comparative evaluation before (pre) and after booster vaccination day 30 and day 90 with (C) Corbevax (Heterologous) and (D) Covishield (Homologous).

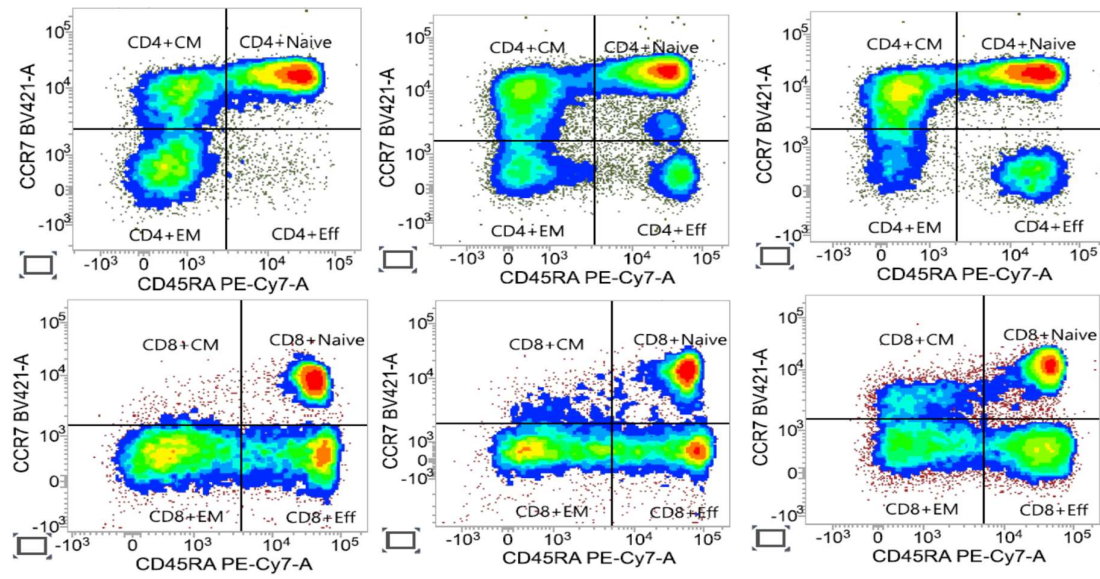

**Figure S2.** Gating strategy of CD4 and CD8 memory in both heterologous and homologous booster samples for Central Memory (CM), Naïve, Effector Memory (EM) and Effector (Eff).

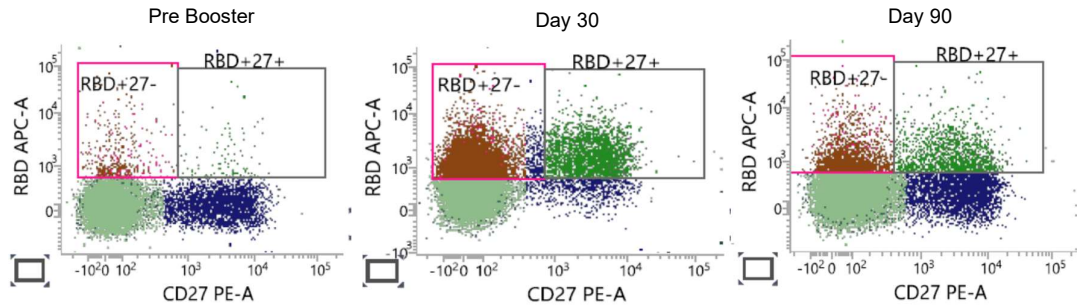

**Figure S3.** Gating strategy of RBD specific memory and non-memory B lymphocytes.
